# Supplementary material
Source: PubMed Central journal article supplement (PMC10769448)
Supplement: NIHMS1939480-supplement-2.pdf [file NIHMS1939480-supplement-2.pdf]

## **ASSOCIATED CONTENT**

**Supporting Information.** Experimental details and data (PDF).

This material is available free of charge via the Internet at <http://pubs.acs.org>.
